# Supplementary material for: Ferric citrate is a safe and digestible source of iron in broilers and piglets
Source: PeerJ. 2021 Dec 22;9:e12636. doi: 10.7717/peerj.12636 (PMC8710060; doi:10.7717/peerj.12636)
Supplement: Supplemental Information 1 [file peerj-09-12636-s001.xlsx]

## Sheet: Summary zootechnical data
Treatment	BW start (g)	BW D14 (g)	ADG D1-14 (g/day)	ADFI D1-14 (g/day)	FCR D1-14	BW D35 (g)	ADG D15-35 (g/day)	ADFI D15-35 (g/day)	FCR D15-35	ADG D1-35 (g/day)	ADFI D1-35 (g/day)	FCR D1-35	Survival D1-14 (%)	Survival D15-35 (%)	Survival D1-35 (%)	EPEF D1-14	EPEF D15-35	EPEF D1-35
1	43.8	410	26.1571	35.4321	1.35459	2183.16	84.4361	122.829	1.4547	61.1245	87.8703	1.43756	100	100	100	193.1	580.437	425.196
1	43.65	435	27.9536	35.95	1.28606	2305	89.0476	121.012	1.35896	64.61	86.9871	1.34634	95	100	95	206.49	655.264	455.898
1	43.9	435	27.9357	33.7214	1.20711	2205	84.2857	120.302	1.42732	61.7457	85.67	1.38746	100	95	95	231.427	560.993	422.774
1	42.7	434	27.95	33.2714	1.19039	2238	85.9048	118.383	1.37808	62.7229	84.3386	1.34462	100	100	100	234.797	623.367	466.472
1	43.1	422	27.0643	34.6714	1.28108	2241	86.619	119.79	1.38296	62.7971	85.7429	1.36539	95	100	95	200.699	626.332	436.924
1	42	429.7	27.6929	33.7643	1.21924	2228	85.6333	119.6	1.39665	62.4571	85.2657	1.36519	100	100	100	227.132	613.133	457.499
1	41.5	433.8	28.0214	33.0929	1.18098	2282	88.0095	122.633	1.39341	64.0143	86.8171	1.35622	95	100	95	225.408	631.613	448.407
1	43.4	440	28.3286	33.2286	1.17297	2205.5	84.0714	123.657	1.47086	61.7743	87.4857	1.41622	100	95	95	241.511	543.002	414.383
2	44.15	448	28.8464	35.9893	1.24762	2311	88.7143	123.621	1.39348	64.7671	88.5686	1.36749	95	100	95	219.652	636.639	449.939
2	43.35	449	28.975	35.875	1.23814	2388	92.3333	123.743	1.34018	66.99	88.5957	1.32252	100	100	100	234.021	688.965	506.532
2	44.15	464.211	30.0043	36.6278	1.22075	2368.42	90.6767	124.147	1.36912	66.4077	89.1395	1.34231	100	100	100	245.786	662.299	494.729
2	41.8	454	29.4429	33.7357	1.1458	2298	87.8095	120.769	1.37535	64.4629	85.9557	1.33341	100	100	100	256.963	638.451	483.442
2	42	438	28.2857	33.9357	1.19975	2305	88.9048	120.505	1.35544	64.6571	85.8771	1.32819	95	100	95	223.976	655.912	462.465
2	41.3	440	28.4786	33.2929	1.16905	2357	91.2857	120.124	1.31591	66.1629	85.3914	1.29062	100	95	95	243.605	659.022	487.01
2	42	450	29.1429	34.1357	1.17132	2327	89.381	122.162	1.36676	65.2857	86.9514	1.33186	100	100	100	248.803	653.964	490.185
2	43.3	445.9	28.7571	34.9714	1.2161	2305	88.5286	120.843	1.36502	64.62	86.4943	1.33851	100	95	95	236.471	616.126	458.638
3	44	435.789	27.985	33.5273	1.19805	2278	87.7243	115.133	1.31245	63.8286	82.4909	1.29238	95	100	95	221.909	668.404	469.189
3	43.2	450.6	29.1	33.0464	1.13562	2368	91.3048	122.394	1.3405	66.4229	86.6551	1.3046	100	100	100	256.249	681.124	509.145
3	42.6	442	28.5286	35.3036	1.23748	2305	88.7143	123.324	1.39012	64.64	88.1157	1.36318	100	100	100	230.537	638.176	474.187
3	44.1	431	27.6357	32.7	1.18325	2305	89.2381	116.886	1.30982	64.5971	83.2114	1.28816	95	100	95	221.88	681.301	476.395
3	43.4	429.5	27.5786	33.2786	1.20668	2288	88.5	123.271	1.3929	64.1314	87.2743	1.36087	100	100	100	228.549	635.366	471.255
3	42	428	27.5714	34.8914	1.26549	2292	88.7619	121.324	1.36685	64.2857	86.7509	1.34946	100	100	100	217.871	649.392	476.382
3	42	430	27.7143	33.0786	1.19356	2302	89.1429	121.981	1.36838	64.5714	86.42	1.33836	100	95	95	232.199	618.877	458.343
3	41.6	433	27.9571	33.3429	1.19264	2344	91	120.895	1.32852	65.7829	85.8743	1.30542	100	100	100	234.414	684.973	503.921

## Sheet: Blood profile
Treatment	Leukozytes (G/l)	Erythrozytes (T/l)	Haemoglobin (g/l)	Haematocrit (l/l)	MCV (fl)	MCH (Pg)	MCHC (g/dl)	Heterophils (%)	Lymphozytes (%)	Monozytes (%)	Eosinophils (%)	Basophils (%)	Alkaline phosphatase (U/l)	AST (U/l)	ALT (U/l)	GLDH (U/l)	Total bilirubin (µmol/l)	LDHA (U/l)	Alpha Amylase (U/l)	CK (U/l)	Cholesterin (mmol/l)	Triglyzerides (mmol/l)	Creatinine (µmol/l)	Urea (mmol/l)	Sodium (mmol/l)	Potassium (mmol/l)	Calcium (mmol/l)	Magnesium (mmol/l)	Chlorides (mmol/l)	Inorganic phosphate (mmol/l)	Glucose (mmol/l)	Albumin (mmol/l)	Total protein (mmol/l)	Globulins (mmol/l)
1	10	2.38	94	0.24	101.8	39.5	38.8	23	59	6	6	6	7774	231	3	2	1.8	1190	1177	12667	4.3	1.96	11.1	0.8	148	4.6	2.87	0.97	107	2.75	12.37	16.4	35	18.6
1	8.3	2.57	104	0.25	99	40.5	40.9	28	59	4	3	6	18979	260	3	2	2.3	814	450	7847	4.23	1.41	8.1	0.8	153	5.6	2.76	1.08	113	2.59	13.66	13.2	33	19.8
1	6.3	2.52	103	0.25	98.9	40.9	41.3	35	41	4	3	17	17581	253	3	2	2.4	831	431	7317	4.02	1.47	8.1	0.8	150	5.3	2.65	1.09	112	2.53	13.48	17.5	32	14.5
1	11.5	2.42	99	0.26	105.9	40.9	38.6	31	52	3	5	9	4755	305	3	2	2.2	1838	626	20611	3.75	1.87	6.2	0.8	153	6	2.65	1.11	114	2.75	14.33	17.1	31	13.9
1	8	2.38	99	0.25	104.9	41.6	39.7	39	43	10	4	4	6201	214	3	2	1.9	643	498	7490	2.96	2.18	5.6	0.8	152	4.4	2.85	1.03	112	2.43	13.72	10	34	24
1	7.3	2.38	98	0.25	104.2	41.2	39.5	25.4819	65.3667	4.48704	1.08575	3.57855	17601	207	3	2	1.7	642	481	6765	2.89	2.22	5.6	0.8	148	4.8	2.73	1.04	110	2.47	13.35	17.8	32	14.2
1	6.8	2.48	95	0.25	100	38.3	38.3	31.7038	54.165	6.93521	2.16399	5.03194	13284	265	3	2.2	0.7	1129	649	12725	3.17	2.2	9.3	0.8	149	6	3.12	0.67	109	2.99	14.52	10.4	30	19.6
1	6.3	2.44	100	0.25	101	41	40.6	40.4814	40.8425	11.7954	2.94885	3.9318	19454	324	4	2	1.9	1724	473	26854	2.9	1.63	8.7	0.8	147	5.1	2.72	1.1	107	2.59	14.75	10	32	22
1	9.8	2.42	94	0.24	99.7	38.8	39	20.5539	69.9845	5.08927	0.970055	3.40222	19124	261	3	2	1.9	1156	646	11757	3.46	1.74	5	0.8	146	5.3	2.76	0.94	109	2.39	14.13	14.3	31	16.7
1	9.3	2.3	90	0.23	100.1	39.1	39.1	26.4511	60.2498	7.71492	1.83688	3.74724	19208	256	3	2	1.7	1149	649	11467	3.4	1.72	4.4	0.8	147	5.5	2.74	0.92	109	2.42	13.96	10.3	32	21.7
1	8.3	2.25	89	0.23	103.6	39.6	38.2	25.7312	56.4519	8.37316	4.93214	4.51157	23032	233	3	2	1.9	1108	633	11948	3.22	1.71	5	0.8	150	5.2	2.72	1.05	111	2.46	13.48	10.8	29	18.2
1	9	2.38	91	0.24	100.5	38.2	38.1	43.6622	46.7731	4.24342	1.21435	4.10697	19006	197	3	2	1.8	830	526	7524	3.42	2.48	6.9	0.8	151	4.9	2.69	1.16	113	2.58	14.02	11	30	19
1	9	2.34	89	0.23	100.1	38	38	34.6367	50.8327	7.19286	2.5344	4.80328	17003	195	3	2	1.8	823	523	6755	3.46	2.37	5.6	0.8	150	4.9	2.67	1.15	112	2.51	14.26	14.6	29	14.4
1	13.9	2.25	85	0.22	105.3	37.8	38.2	30.8293	44.6589	12.0606	3.26212	9.18907	17071	371	4	2	1.6	3286	485	6373	3.28	1.86	5.6	0.81	149	5.7	2.64	1	109	2.75	14.77	13.5	28	14.5
1	7	2.32	92	0.23	100.7	39.7	39.4	33.8579	47.1897	9.24011	2.42806	7.28417	15184	260	3	2	1.9	1042	702	12652	2.99	1.6	6.9	0.8	150	6.2	2.76	1.03	109	2.46	14.86	15.2	30	14.8
1	9.7	2.28	90	0.23	100.4	39.5	39.3	25.7489	55.7953	8.96933	1.94365	7.5428	14611	256	3	2	1.8	1044	700	12400	2.99	1.57	5.6	0.8	148	5.9	2.79	1.03	108	2.44	14.82	12.3	30	17.7
2	9.8	2.29	91	0.23	98.2	39.7	40.5	37	51	6	4	2	16866	178	3	2	2	647	641	3050	3.42	1.15	6.2	0.8	149	5.4	2.61	1.09	112	2.65	13.76	13.2	29	15.8
2	8.3	2.34	90	0.23	100.1	38.5	38.4	32	52	10	2	4	17211	175	3	2	2.1	568	646	2898	3.45	1.19	6.9	0.8	149	4.5	2.61	1.08	111	2.61	13.52	14.6	29	14.4
2	8.8	2.49	99	0.25	101.7	39.8	39.1	28	51	7	9	5	34338	161	4	3.2	2	894	745	9394	3.74	1.72	8.1	1.11	157	5.3	2.99	1.18	116	2.86	14.9	15.6	32	16.4
2	9.2	2.34	95	0.24	101.2	40.6	40.1	34	53	5	5	3	29082	149	5	2.8	1.9	756	739	8146	3.6	1.76	9.3	1.16	155	4.6	2.9	1.17	116	2.78	14.36	10.6	33	22.4
2	7.5	2.35	96	0.25	105.9	40.9	38.6	25	68	4	2	1	10556	189	3	2	1.6	707	762	5416	3.36	1.9	6.9	0.8	153	4.3	2.86	1.12	112	2.79	14.26	12.8	30	17.2
2	7	2.35	96	0.25	106.1	40.9	38.5	23.0942	61.5696	6.15546	3.07024	6.11053	9900	188	3	2	1.6	697	755	5158	3.35	2	6.9	0.8	152	4.2	2.81	1.11	111	2.7	13.9	11.5	30	18.5
2	10.5	2.16	91	0.23	106.4	42.1	39.6	26.9235	59.3665	6.14585	3.01383	4.55029	8492	256	3	2	1.9	1750	646	18890	3.4	1.39	8.1	0.8	153	5.2	2.84	1.09	112	2.78	15.28	13.4	37	23.6
2	10.3	2.52	102	0.26	104.3	40.5	38.8	26.8158	60.1528	5.92338	2.59079	4.51727	11166	370	3	2	1.8	2428	839	22452	3.32	1.24	7.5	0.83	155	5.6	2.87	1.03	113	2.58	16.02	14.8	30	15.2
2	6.5	2.16	92	0.23	106	42.6	40.2	38.7297	46.5898	4.62728	5.04564	5.00761	11568	367	3	2	1.6	2471	840	22132	3.29	1.22	8.1	0.81	155	5.2	2.83	1.03	113	2.61	15.27	13.7	30	16.3
2	7	2.44	99	0.26	104.5	40.6	38.8	29.9247	50.8617	9.63871	3.97038	5.60449	7735	285	3	2	2	823	326	11805	3.49	1.7	5	0.8	157	4.7	2.65	1.05	115	2.74	14.83	15.2	28	12.8
2	8.7	2.39	96	0.25	104.8	40.2	38.3	22.3967	57.6984	11.5224	3.51433	4.86821	7257	281	3	2	1.8	825	325	11166	3.5	1.84	6.9	0.8	155	4.9	2.64	1.04	114	2.78	14.68	13.2	28	14.8
2	9.5	2.39	99	0.25	105.4	41.4	39.3	30.3035	53.9156	8.42339	4.33753	3.01999	4107	271	3	2	1.5	771	768	14063	3.69	1.53	10.5	0.8	157	5.1	2.87	1.04	116	2.71	14.99	15.2	34	18.8
2	11.2	2.39	98	0.25	105.4	41	38.9	28.1839	53.4758	8.76594	5.15538	4.4189	4122	272	3	2	1.8	805	773	14143	3.65	1.77	9.3	0.8	159	5	2.86	1.04	116	2.76	14.66	12.7	35	22.3
2	6.8	2.25	84	0.24	106	37.3	35.2	37.9267	43.6766	6.96698	5.67991	5.74986	17295	662	4	2	1.9	3620	485	6484	3.86	1.64	7.5	0.95	156	4.5	2.84	1.05	113	2.51	14.28	11.6	34	22.4
2	12.6	2.24	85	0.22	99.6	37.9	38.1	37.0151	40.9554	10.2693	5.11182	6.64841	17639	672	4	2.3	1.9	3663	467	6724	3.91	1.76	7.5	0.95	154	4.7	2.81	1.06	112	2.5	14.22	14.8	33	18.2
2	9.7	2.23	84	0.22	98.5	37.7	38.2	45.8993	36.6948	8.30693	4.29426	4.80465	8715	217	3	2	1.8	802	909	11939	3.28	2.07	7.5	0.8	150	4.5	2.77	1.07	109	2.71	14.78	14	32	18
3	6.3	2.36	95	0.24	103.1	40.3	39	27	60	4	0	9	11176	186	3	2	1.5	515	534	4050	3.4	1.59	8.7	0.86	155	3.2	2.81	1.06	111	2.33	14.6	13.5	31	17.5
3	8.8	2.27	92	0.24	104.6	40.5	38.8	18	69	4	4	5	11054	188	3	2	1.6	619	533	4074	3.43	1.64	9.3	0.87	157	3.5	2.85	1.08	112	2.4	14.55	14.2	31	16.8
3	6	2.19	89	0.23	104.8	40.6	38.8	30	48	13	3	6	14926	187	3	2	1.5	772	602	4114	3.43	1.72	6.9	0.8	150	5.5	2.83	1.02	111	2.7	14.73	11.4	30	18.6
3	10.3	2.16	72	0.23	104.5	33.3	31.9	31	55	9	2	3	13966	184	3	2	1.7	768	597	4138	3.38	1.8	8.1	0.8	149	5.6	2.79	1.01	110	2.76	14.67	12.7	30	17.3
3	12.1	2.35	94	0.25	104.4	40	38.3	22	61	9	3	5	13156	214	3	2	1.6	741	742	6702	2.92	2.41	5	0.8	154	5.4	2.75	1.04	115	2.76	13.81	11.5	30	18.5
3	9.6	2.26	90	0.24	105.2	39.8	37.9	36.8222	48.3226	5.90533	3.57307	5.37684	13115	210	3	2	1.5	743	745	6785	2.92	2.3	6.2	0.8	154	5.2	2.79	1.05	115	2.82	13.52	12.6	31	18.4
3	6	2.25	89	0.23	102.2	39.6	38.7	29.9768	56.5582	5.22851	3.17583	5.06068	4711	380	4	2	1.6	977	859	5144	3.49	2.29	9.9	0.91	155	5.3	2.87	1.13	114	2.99	14.46	10.3	31	20.7
3	11.5	2.2	90	0.23	105.2	40.9	38.9	24.6729	58.8955	6.01529	5.23364	5.18267	7806	274	3	2	1.5	1023	859	19381	2.95	1	7.5	0.8	151	4.9	2.75	0.95	112	2.55	14.17	14.5	31	16.5
3	12.4	2.25	91	0.24	108.1	40.4	37.4	30.8674	50.6008	9.61322	4.95682	3.9617	11084	328	3	2	1.7	2186	681	23693	3.41	2.34	7.5	0.83	152	4.8	2.75	0.99	113	2.51	15.49	14	30	16
3	7.5	2.24	89	0.24	108.4	39.7	36.7	24.0903	52.308	11.5903	5.82884	6.18261	11988	327	3	2	2	2188	673	24253	3.48	2.53	6.2	0.8	153	5	2.76	0.98	113	2.59	15.41	13.3	30	16.7
3	6.3	2.35	99	0.24	102	42.1	41.3	22.6147	53.6571	10.2899	6.29679	7.14149	13842	365	3	2	1.8	1800	506	7006	3.05	2.43	4.4	0.8	151	5.2	2.64	1.04	114	2.76	14.02	13.8	33	19.2
3	13.2	2.35	98	0.24	102.3	41.7	40.8	24.6906	59.4528	6.0456	4.26059	5.55049	13719	363	3	2	1.7	1804	499	2873	3.03	1.5	5	0.8	152	4.7	2.66	1.06	114	2.86	13.98	12.4	29	16.6
3	9	2.34	92	0.24	102.6	39.3	38.3	33.5381	51.749	5.18024	4.87316	4.65955	13513	346	3	2.6	1.8	2354	502	29296	3.65	1.8	8.1	0.8	152	5.7	2.74	1.05	112	2.67	14.29	13.4	32	18.6
3	11.7	2.34	92	0.24	102.6	39.3	38.3	46.5627	36.7621	7.24508	3.97393	5.45617	12826	352	4	2.7	2	2365	502	28575	3.71	1.9	7.5	0.8	154	5.2	2.77	1.08	113	2.68	14.65	12.3	31	18.7
3	9.5	2.13	84	0.22	105.2	39.4	37.5	31.8863	51.2486	7.91395	3.64964	5.30158	5912	343	3	2	1.4	523	651	5133	2.96	1.44	6.9	0.8	152	5.1	2.64	0.99	111	2.37	14.82	11.9	35	23.1
3	10	2.08	83	0.22	104.7	39.9	38.1	28.6314	54.5257	7.31354	4.28675	5.24258	6309	342	3	2	1.5	2469	655	6945	2.9	1.59	5.6	0.8	154	4.7	2.72	1.03	112	2.52	15.01	12.8	28	15.2

## Sheet: Glossary & formulae
Abbreviation	Description	Units	Formula
Zootechnical performance
ADFI	Average daily feed intake	g/day
ADG	Average daily gain	g/day
BW	Average body weight	g
BWG	Average body weight gain	g
EPEF	European production efficiency factor	-
FCR	Feed conversion ratio	-
FI	Feed intake	g
Survival	-	%
Blood profile
Albumin	-	mmol/l	-
Alkaline phosphatase	-	U/l	-
Alpha amylase	-	U/l	-
ALT	Alanine aminotransferase	U/l	-
AST	Aspartate transaminase	U/l	-
Basophils	-	%	-
Calcium	-	mmol/l	-
Chlorides	-	mmol/l	-
Cholesterin	-	mmol/l	-
CK	Creatine kinase	U/l	-
Creatinine	-	µmol/l	-
Eosinophils	-	%	-
Erythrozytes	-	T/l	-
GLDH	Glutamate dehydrogenase	U/l	-
Globulins	-	mmol/l	-
Glucose	-	mmol/l	-
Haematocrit	-	l/l	-
Haemoglobin	-	g/l	-
Heterophils	-	%	-
Inorganic phosphate (mmol/l)	-	mmol/l	-
LDHA	L- lactate dehydrogenase	U/l	-
Leukozytes	-	G/l	-
Lymphozytes	-	%	-
Magnesium	-	mmol/l	-
MCH	Mean corpuscular haemoglobin	Pg	-
MCHC	Mean corpuscular haemoglobin concentration	g/dl	-
MCV	Mean corpuscular volume	Fl	-
Monozytes	-	%	-
Potassium	-	mmol/l	-
Sodium	-	mmol/l	-
Total bilirubin	-	µmol/l	-
Total protein	-	mmol/l	-
Triglyzerides	-	mmol/l	-
Urea	-	mmol/l	-
