# Supplementary material for: Ferric citrate is a safe and digestible source of iron in broilers and piglets
Source: PeerJ. 2021 Dec 22;9:e12636. doi: 10.7717/peerj.12636 (PMC8710060; doi:10.7717/peerj.12636)
Supplement: Supplemental Information 2 [file peerj-09-12636-s002.xlsx]

## Sheet: Performance SPSS
Treatment	BW 25 d (kg)	BW 31 d (kg)	BWG d 25 to 31 (kg)	FI d 25-31 d (kg)	FCR d 25-31	BW d 38 (kg)	BWG d 32 - 38 (kg)	FI d 32 - 38 (kg)	FCR d 32 - 38	BW d 45 (kg)	BWG d 39 - 45 (kg)	FI d 39 - 45 (kg)	FCR d 39 - 45	BW d 52 (kg)	BWG d 46-52 (kg)	FI 46-52 (kg)	FCR d 46 - 52	BW d 59(kg)	BWG d 53-59 (kg)	FI d 53 -59 (kg)	FCR d 53 - 59	BW d 66 (kg)	BWG d 60-66 (kg)	FI d 60 -66 (kg)	FCR d 60 - 66	BWG d 25-38 (kg)	FI d 25-38 (kg)	FCR d 25-38	BWG/d 25-38 (kg/d)	FI/d 25-38 (kg/d)	BWG d 39-66 (kg)	FI d 39-66 (kg)	FCR d 39-66	BWG d 39-66 (kg/d)	FI d 39-66 (kg/d)	BWG d 25-66 (kg)	FI d 25-66 (kg)	FCR d 25-66	BWG d 1-42 (kg/d)	FI d 1-42 (kg/d)	Age at start
1	7.59	8.02	0.43	0.66	1.53488	9.42	1.4	1.82	1.3	12.08	2.66	4.08	1.53383	15.36	3.28	5.18	1.57927	19.48	4.12	6.27	1.52184	24.73	5.25	8.705	1.6581	1.83	2.48	1.35519	130.714	177.143	15.31	24.235	1.58295	546.786	865.536	17.14	26.715	1.55863	408.095	636.071	25
1	7.16	7.88	0.72	0.95	1.31944	8.925	1.045	1.49	1.42584	10.935	2.01	3.05	1.51741	13.77	2.835	4.035	1.42328	18.12	4.35	5.935	1.36437	22.82	4.7	7.88	1.6766	1.765	2.44	1.38244	126.071	174.286	13.895	20.9	1.50414	496.25	746.429	15.66	23.34	1.49042	372.857	555.714	24
1	6.93	7.75	0.82	1.55	1.89024	9.29	1.54	2.27	1.47403	11.55	2.26	3.37	1.49115	15.04	3.49	5.45	1.5616	19.05	4.01	6.31	1.57357	24.11	5.06	8.47	1.67391	2.36	3.82	1.61864	168.571	272.857	14.82	23.6	1.59244	529.286	842.857	17.18	27.42	1.59604	409.048	652.857	25.5
1	7.62	8.07	0.45	0.64	1.42222	9.88	1.81	2.39	1.32044	12.55	2.67	4.39	1.64419	15.11	2.56	4.3	1.67969	19.3	4.19	6.77	1.61575	23.89	4.59	7.33	1.59695	2.26	3.03	1.34071	161.429	216.429	14.01	22.79	1.6267	500.357	813.929	16.27	25.82	1.58697	387.381	614.762	25.4
1	7.25	8	0.75	1.02	1.36	9.28	1.28	2.04	1.59375	11.56	2.28	3.85	1.6886	15.49	3.93	5.22	1.32824	19.49	4	6.8	1.7	24.78	5.29	8.34	1.57656	2.03	3.06	1.50739	145	218.571	15.5	24.21	1.56194	553.571	864.643	17.53	27.27	1.55562	417.381	649.286	25
1	7.01	7.49	0.48	0.78	1.625	9.345	1.855	2.58	1.39084	12.1	2.755	4.02	1.45917	15.77	3.67	5.03	1.37057	19.85	4.08	6.85	1.67892	25.35	5.5	8.325	1.51364	2.335	3.36	1.43897	166.786	240	16.005	24.225	1.51359	571.607	865.179	18.34	27.585	1.50409	436.667	656.786	25.6
1	7.53	8.02	0.49	0.72	1.46939	9.67	1.65	2.24	1.35758	12.83	3.16	4.02	1.27215	15.93	3.1	5.11	1.64839	19.87	3.94	6.2	1.5736	24.88	5.01	8.59	1.71457	2.14	2.96	1.38318	152.857	211.429	15.21	23.92	1.57265	543.214	854.286	17.35	26.88	1.54928	413.095	640	25
1	7.71	8.32	0.61	0.88	1.44262	10.05	1.73	2.36	1.36416	12.98	2.93	3.96	1.35154	16.1	3.12	4.73	1.51603	20.05	3.95	5.91	1.4962	25.4	5.35	8.66	1.61869	2.34	3.24	1.38462	167.143	231.429	15.35	23.26	1.51531	548.214	830.714	17.69	26.5	1.49802	421.19	630.952	24
2	7.33	7.96	0.63	0.87	1.38095	9.2	1.24	1.86	1.5	11.64	2.44	3.86	1.58197	15.19	3.55	5.03	1.4169	19.45	4.26	6.15	1.44366	24.95	5.5	8.48	1.54182	1.87	2.73	1.45989	133.571	195	15.75	23.52	1.49333	562.5	840	17.62	26.25	1.48978	419.524	625	24
2	7.15	8.06	0.91	1.07	1.17582	10.3	2.24	3.15	1.40625	13.76	3.46	4.66	1.34682	17.37	3.61	4.86	1.34626	21.58	4.21	6.39	1.51781	27.05	5.47	8.48	1.55027	3.15	4.22	1.33968	225	301.429	16.75	24.39	1.45612	598.214	871.071	19.9	28.61	1.43769	473.81	681.19	25
2	7.4	8.21	0.81	1.2	1.48148	9.995	1.785	2.027	1.13557	12.68	2.685	3.85	1.43389	16.22	3.54	5.05	1.42655	20.35	4.13	6.12	1.48184	25.32	4.97	8.41	1.69215	2.595	3.227	1.24355	185.357	230.5	15.325	23.43	1.52887	547.321	836.786	17.92	26.657	1.48756	426.667	634.69	26
2	7.785	8.22	0.435	0.655	1.50575	9.87	1.65	2.25	1.36364	12.25	2.38	3.74	1.57143	16.11	3.86	5.55	1.43782	20.27	4.16	6.77	1.6274	25.77	5.5	8.64	1.57091	2.085	2.905	1.39329	148.929	207.5	15.9	24.7	1.55346	567.857	882.143	17.985	27.605	1.53489	428.214	657.262	25
2	7.21	7.75	0.54	0.79	1.46296	9.52	1.77	2.47	1.39548	12.14	2.62	3.84	1.46565	15.21	3.07	4.42	1.43974	19.1	3.89	6.2	1.59383	24.16	5.06	7.86	1.55336	2.31	3.26	1.41126	165	232.857	14.64	22.32	1.52459	522.857	797.143	16.95	25.58	1.50914	403.571	609.048	24
2	7.49	7.89	0.4	0.68	1.7	9.5	1.61	1.94	1.20497	12.42	2.92	3.88	1.32877	15.55	3.13	4.28	1.36741	19.82	4.27	6.49	1.51991	25	5.18	7.82	1.50965	2.01	2.62	1.30348	143.571	187.143	15.5	22.47	1.44968	553.571	802.5	17.51	25.09	1.4329	416.905	597.381	25
2	7.34	7.96	0.62	0.92	1.48387	9.36	1.4	1.96	1.4	11.85	2.49	3.27	1.31325	15.3	3.45	5.01	1.45217	19.35	4.05	6.16	1.52099	24.09	4.74	7.99	1.68565	2.02	2.88	1.42574	144.286	205.714	14.73	22.43	1.52274	526.071	801.071	16.75	25.31	1.51104	398.81	602.619	26
2	7.1	7.84	0.74	1.05	1.41892	9.55	1.71	2.3	1.34503	12.08	2.53	3.49	1.37945	15.62	3.54	4.53	1.27966	20.05	4.43	6.863	1.54921	25.35	5.3	8.19	1.54528	2.45	3.35	1.36735	175	239.286	15.8	23.073	1.46032	564.286	824.036	18.25	26.423	1.44784	434.524	629.119	25
3	7.16	8.08	0.92	1.36	1.47826	10.018	1.938	2.35	1.21259	13.495	3.477	4.55	1.3086	16.67	3.175	4.535	1.42835	21.26	4.59	7.01	1.52723	26.27	5.01	8.42	1.68064	2.858	3.71	1.29811	204.143	265	16.252	24.515	1.50843	580.429	875.536	19.11	28.225	1.47698	455	672.024	25
3	7.245	7.97	0.725	1.02	1.4069	9.35	1.38	1.66	1.2029	11.63	2.28	3.18	1.39474	14.815	3.185	4.28	1.3438	19.39	4.575	6.665	1.45683	24.88	5.49	8.69	1.58288	2.105	2.68	1.27316	150.357	191.429	15.53	22.815	1.46909	554.643	814.821	17.635	25.495	1.4457	419.881	607.024	26
3	7.195	7.88	0.685	0.985	1.43796	9.42	1.54	1.98	1.28571	12.35	2.93	3.84	1.31058	15.38	3.03	4.37	1.44224	19.3	3.92	6.17	1.57398	24.81	5.51	8.58	1.55717	2.225	2.965	1.33258	158.929	211.786	15.39	22.96	1.49188	549.643	820	17.615	25.925	1.47176	419.405	617.262	25
3	7.81	8.44	0.63	0.95	1.50794	10.68	2.24	3.21	1.43304	13.32	2.64	3.935	1.49053	17.18	3.86	5.075	1.31477	21.44	4.26	6.55	1.53756	26.63	5.19	8.035	1.54817	2.87	4.16	1.44948	205	297.143	15.95	23.595	1.47931	569.643	842.679	18.82	27.755	1.47476	448.095	660.833	24
3	7.26	8.06	0.8	0.68	0.85	10.11	2.05	2.94	1.43415	12.57	2.46	3.66	1.4878	16.21	3.64	5.01	1.37637	20.23	4.02	6.075	1.51119	25.25	5.02	7.93	1.57968	2.85	3.62	1.27018	203.571	258.571	15.14	22.675	1.49769	540.714	809.821	17.99	26.295	1.46165	428.333	626.071	25
3	7.21	7.8	0.59	0.88	1.49153	9.56	1.76	2.16	1.22727	12.04	2.48	3.69	1.4879	15.42	3.38	4.52	1.33728	19.57	4.15	6.09	1.46747	24.94	5.37	7.99	1.4879	2.35	3.04	1.29362	167.857	217.143	15.38	22.29	1.44928	549.286	796.071	17.73	25.33	1.42865	422.143	603.095	25
3	7.63	8.24	0.61	0.8	1.31148	9.88	1.64	2.07	1.2622	12.52	2.64	3.93	1.48864	16.27	3.75	5.48	1.46133	20.3	4.03	6.04	1.49876	25.68	5.38	8.28	1.53903	2.25	2.87	1.27556	160.714	205	15.8	23.73	1.5019	564.286	847.5	18.05	26.6	1.47368	429.762	633.333	24
3	7.33	7.97	0.64	0.9	1.40625	9.67	1.7	2	1.17647	12.44	2.77	3.68	1.32852	16.44	4	5.25	1.3125	20.48	4.04	6.3	1.55941	25.27	4.79	7.8	1.62839	2.34	2.9	1.23932	167.143	207.143	15.6	23.03	1.47628	557.143	822.5	17.94	25.93	1.44537	427.143	617.381	26

## Sheet: Blood SPSS
Treatment	Leukozytes (G/l)	Erythrozytes (T/l)	Haemoglobin (g/l)	Haematocrit (l/l)	MCV (fl)	MCH	MCHC (g/dl)	Thrombozytes (G/l)	Neutrophils (%)	Lymphozytes (%)	Monozytes (%)	Eosinophils (%)	Basophils (%)	Other cells (%)	Alkaline phosphatase (U/l)	AST (U/l)	ALT (U/l)	GLDH (U/l)	Total bilirubin (µmol/l)	LDHA (U/l)	Alpha Amylase (U/l)	CK (U/l)	Cholesterin (mmol/l)	Triglyzerides (mmol/l)	Creatinine (µmol/l)	Urea (mmol/l)	Sodium (mmol/l)	Potassium (mmol/l)	Calcium (mmol/l)	Magnesium (mmol/l)	Chlorides (mmol/l)	Inorganic phosphate (mmol/l)	Glucose (mmol/l)	Albumin (mmol/l)	Total protein (mmol/l)	Globulins (mmol/l)	Haptoglobin (mg/ml)
1	18.6	6.88	115	0.38	54.6	16.7	30.6	438	41	51	4	1	0	2	285	39	73	2.5	1.7	538	3598	602	1.5	0.32	69.9	2.04	144	5.9	2.62	1.03	101	3.2	5.73	27.2	46	18.8	0.56
1	12.8	6.45	101	0.32	49.1	15.7	31.9	478	24	64	10	1	0	1	258	53	68	2	1.4	685	2915	1141	1.4	0.43	76.1	2.59	145	5.2	2.64	0.85	105	3.39	5.63	27.4	46	18.6	0.53
1	13.5	5.71	95	0.3	51.6	16.6	32.2	679	49	41	4	2	1	3	312	45	55	2	0.7	713	3424	1551	1.91	0.39	64.2	0.93	143	4.9	2.54	0.89	101	3.54	5.89	24.9	44	19.1	1
1	17.9	6.53	97	0.33	49.8	14.9	29.8	442	24	64	8	2	2	1	293	48	66	2	1.35	1185	3788	1833	1.91	0.42	62.4	1.52	143	6.1	2.45	0.98	103	3.02	5.76	25.9	48	22.1	0.58
1	25	6.4	109	0.35	55.3	17	30.8	452	51	41	5	2	1	0	316	49	69	2	1.5	684	3245	1104	1.54	0.46	74.9	1.43	146	6.7	2.6	0.9	107	3.02	6.16	21.2	45	23.8	0.4
1	20.8	6.32	103	0.32	51	16.3	32	678	50	42	5	1	1	1	286	46	58	2	1.6	795	3459	2195	1.82	0.35	78	1.75	142	6.3	2.61	0.8	105	2.91	5.68	27.4	50	22.6	0.5
1	16.3	6.3	107	0.34	54	17	31.5	365	33	59	4	3	1	1	507	37	49	2	0.8	730	2855	655	1.94	0.48	74.9	1.06	148	7.1	2.71	0.87	107	3.14	6.39	23.4	45	21.6	0.44
1	11.5	6.52	111	0.36	54.9	17	31	355	38	52	6	2	1	1	382	61	75	2	0.7	793	3774	1947	1.64	0.33	57.4	1.03	147	6.4	2.79	0.97	104	3.56	5.82	28.1	47	18.9	0.39
2	16.9	5.86	97	0.29	50.2	16.6	33	551	57	34	4	3	0	2	380	40	86	2	0.9	539	2287	530	1.52	0.4	62.4	1.3	143	4.6	2.6	0.8	102	3.39	5.63	27.4	46	18.6	0.53
2	17.1	5.96	96	0.31	51.7	16.1	31.2	462	33	59	4	1	1	3	399	56	66	2	0.7	664	4067	472	1.79	0.84	60.5	1.33	144	6.1	2.6	0.92	106	3.66	5.7	26.7	45	18.3	0.31
2	17.9	5.86	91	0.29	49.2	15.6	31.7	474	41	49	2	2	1	5	415	48	53	2	1.8	673	2215	1817	2.2	0.49	69.9	1.82	148	5.8	2.65	0.9	105	3.15	5.84	30.4	53	22.6	0.42
2	11.5	5.83	99	0.3	51	17	33.3	255	43	45	7	3	1	1	383	38	60	4.6	0.8	696	2984	889	1.88	0.39	61.2	2.19	144	6	2.59	0.91	103	3.23	5.59	24.8	43	18.2	0.61
2	19.8	6.51	116	0.36	55	17.8	32.4	600	22	67	7	2	1	1	266	47	64	2	2.2	599	2591	1134	1.51	0.39	61.1	0.84	141	5.4	2.76	0.93	101	3.23	5.3	25.3	49	23.7	0.35
2	19.6	5.93	115	0.35	59.4	19.4	32.7	257	44	48	3	2	2	1	345	38	59	2	1	1173	3152	2410	2.01	0.35	56.1	1.92	143	5.3	2.55	0.9	102	3.61	5.65	25.7	48	22.3	0.74
2	16.1	6.43	119	0.38	59.4	18.5	31.2	550	43	49	4	2	0	2	393	32	64	2	2.4	609	3139	777	1.79	0.36	62.4	2.13	146	6.7	2.74	1.16	103	3.27	6.67	24.8	44	19.2	0.31
2	12.8	6.36	112	0.35	54.5	17.6	32.3	238	50	40	4	4	0	1	356	72	74	2	2.3	642	3017	668	1.83	0.46	86.8	2.19	141	5.9	2.49	0.98	102	3.24	6.02	24.5	43	18.5	0.32
3	21.7	5.95	95	0.31	52.2	16	30.6	620	49	42	6	3	1	1	214	37	46	2	1.9	532	2349	474	1.53	0.72	53	2.25	144	5.4	2.65	0.91	104	3.14	6.1	21.8	51	29.2	0.5
3	18	5.93	104	0.32	54.6	17.5	32.1	410	23	65	7	1	1	4	324	32	52	2	0.6	960	3970	1641	2.15	0.61	69.2	1.48	145	6.2	2.84	0.93	103	3.42	6.14	26.4	48	21.6	0.51
3	13.7	6.11	114	0.36	59.4	18.7	31.4	435	38	54	3	2	0	2	369	32	59	2	1.7	500	3010	851	1.51	0.23	59.2	1.51	144	5.5	2.93	0.87	101	3.53	6.1	31.9	51	19.1	0.57
3	14.2	6.53	118	0.36	54.3	18.1	33.3	532	52	40	2	3	2	2	246	51	62	2	1	838	2313	2996	1.71	0.19	63.6	2.1	143	4.7	2.66	0.82	104	2.7	5.14	26.4	46	19.6	0.34
3	12.4	7.26	115	0.37	51.3	15.8	30.9	459	23	69	6	1	1	0	303	47	52	2	1.6	711	2256	3084	1.26	0.25	54.9	1.5	145	5.7	2.65	0.93	104	3.58	6.26	27.3	46	18.7	0.39
3	10.8	5.52	96	0.31	55.8	17.4	31.2	363	25	65	6	3	0	1	373	22	37	2	2	542	2662	628	1.78	0.34	77.4	1.74	148	5.6	2.78	0.94	106	3.22	6.01	25.3	43	17.7	0.36
3	22.5	7.27	115	0.37	50.8	15.8	31.1	429	23	69	3	2	1	2	245	63	71	2	1.5	768	3118	1184	1.75	0.57	77.4	2.81	148	6.8	2.8	0.96	106	3.45	6.25	26.2	48	21.8	0.5
3	21.8	7.13	123	0.38	53.8	17.3	32.1	445	37	55	5	2	1	0	351	78	59	2.9	2	910	3750	1783	1.83	0.46	86.8	2.19	141	5.9	2.49	0.98	103	2.99	6.03	27.3	50	22.7	0.35
