# Supplementary material for: Ferric citrate is a safe and digestible source of iron in broilers and piglets
Source: PeerJ. 2021 Dec 22;9:e12636. doi: 10.7717/peerj.12636 (PMC8710060; doi:10.7717/peerj.12636)
Supplement: Supplemental Information 3 [file peerj-09-12636-s003.xlsx]

## Sheet: Tabelle1
Treatment	BW start (kg)	BW d 7 (k)	BWG d 1-7 (kg)	FI d 1 - 7 (kg)	FCR d 1 - 7	BW d 14 (kg)	BWG d 8-14 (kg)	FI d 8 -14 (kg)	FCR d 8 - 14	BW d 21 (kg)	BWG d 15-21 (kg)	FI d 15-21 (kg)	FCR d 15 - 21	BW d 28 (kg)	BWG d 22-28 (kg)	FI d 22-28 (kg)	FCR d 22 - 28	BW d 35 (kg)	BWG d 29-35 (kg)	FI d 29-35 (kg)	FCR d 29 - 35	BW d 42 (kg)	BWG d 36-42 (kg)	FI d 36-42 (kg)	FCR d 36 - 42	BWG d 1 - 14 (kg)	FI d 1 - 14 (kg)	FCR d 1 - 14	BWG d 15 - 42 (kg)	FI d 15 - 42 (kg)	FCR d 15 - 42	BWG d 1 - 42 (kg)	FI d 1 - 42 (kg)	FCR d 1 - 42	Scoring wk 1	Scoring wk 2	Scoring wk 3	Scoring wk 4	Scoring wk 5	Scoring wk 6	Scoring wk 1-2	Scoring wk 3-6	Scoring wk 1 - 6	ADG d 1-14 (kg)	ADG d 15- 42 (kg)	ADG d 1 - 42 (kg)	ADFI d 1-14 (kg)	ADFI d 15-42 (kg)	ADFI d 1 -42 (kg)
1	6.535	7.55	1.015	1.02	1.00493	9.05	1.5	2.28	1.52	13.26	4.21	5.48	1.30166	17.05	3.79	6.04	1.59367	21.8	4.75	7.08	1.49053	26.88	5.08	9	1.77165	2.515	3.3	1.31213	17.83	27.6	1.54795	20.345	30.9	1.5188	3.5	3.8	4	3.8	4	3.8	3.65	3.9	3.775	0.179643	0.636786	0.484405	0.235714	0.985714	0.735714
1	6.905	7.525	0.62	0.7	1.12903	9.72	2.195	3	1.36674	13.96	4.24	5.586	1.31745	18.11	4.15	6	1.44578	23	4.89	7.21429	1.47531	28	5	9	1.8	2.815	3.7	1.31439	18.28	27.8003	1.5208	21.095	31.5003	1.49326	3.8	3.5	3.6	4	4	4	3.65	3.9	3.775	0.201071	0.652857	0.502262	0.264286	0.992867	0.750007
1	7.845	8.965	1.12	1.36	1.21429	10.32	1.355	2.04	1.50554	13.4	3.08	5.08	1.64935	17.18	3.78	5.77143	1.52683	22.48	5.3	7.8	1.4717	27.55	5.07	8.7	1.71598	2.475	3.4	1.37374	17.23	27.3514	1.58743	19.705	30.7514	1.56059	3	3.3	4	4	4	4	3.15	4	3.575	0.176786	0.615357	0.469167	0.242857	0.976837	0.732177
1	7.125	8.09	0.965	1.25	1.29534	10.9	2.81	3.52	1.25267	15	4.1	6	1.46341	18.86	3.86	6	1.5544	23.45	4.59	7.03	1.53159	28.75	5.3	8.6	1.62264	3.775	4.77	1.26358	17.85	27.63	1.5479	21.625	32.4	1.49827	3.5	3.5	3	2.3	4	3.8	3.5	3.275	3.3875	0.269643	0.6375	0.514881	0.340714	0.986786	0.771429
1	7.895	9.02	1.125	1.55	1.37778	10.8	1.78	2.8	1.57303	14	3.2	4.51	1.40938	18	4	6.32	1.58	22.5	4.5	7.45	1.65556	27.47	4.97	8.6	1.73038	2.905	4.35	1.49742	16.67	26.88	1.61248	19.575	31.23	1.5954	3	3.4	2.8	4	3	3.8	3.2	3.4	3.3	0.2075	0.595357	0.466071	0.310714	0.96	0.743571
1	9.34	10.6	1.26	0.87	0.690476	12.3	1.7	2.9	1.70588	15.58	3.28	4.61	1.40549	19	3.42	5.14	1.50292	23	4	6.54	1.635	28.22	5.22	8.5	1.62835	2.96	3.77	1.27365	15.92	24.79	1.55716	18.88	28.56	1.51271	3	3.5	3	3.5	3.8	4	3.25	3.575	3.4125	0.211429	0.568571	0.449524	0.269286	0.885357	0.68
1	8.84	9.46	0.62	0.7	1.12903	11	1.54	2.28	1.48052	14.96	3.96	5.5	1.38889	19	4.04	6.09	1.50743	23.58	4.58	7.21429	1.57517	29.01	5.43	9	1.65746	2.16	2.98	1.37963	18.01	27.8043	1.54382	20.17	30.7843	1.52624	3	3.5	3.5	4	4	4	3.25	3.875	3.5625	0.154286	0.643214	0.480238	0.212857	0.99301	0.732959
1	6.695	7.58	0.885	1	1.12994	9.64	2.06	2.78	1.34951	13.26	3.62	4.75	1.31215	17	3.74	5.5	1.47059	20.8	3.8	6.08	1.6	26.51	5.71	9.55	1.6725	2.945	3.78	1.28353	16.87	25.88	1.53408	19.815	29.66	1.49685	3.5	3.8	3.8	4	3.8	4	3.65	3.9	3.775	0.210357	0.6025	0.471786	0.27	0.924286	0.70619
1	8.06	9.52	1.46	1.95	1.33562	11.18	1.66	2.04	1.22892	14.8	3.62	6	1.65746	19	4.2	6.67	1.5881	23.02	4.02	6.5	1.61692	28.32	5.3	8.9	1.67925	3.12	3.99	1.27885	17.14	28.07	1.63769	20.26	32.06	1.58243	3.8	3.8	3.8	4	3.8	4	3.8	3.9	3.85	0.222857	0.612143	0.482381	0.285	1.0025	0.763333
1	8.08	9	0.92	1.254	1.36304	10.36	1.36	1.88	1.38235	13.54	3.18	4.22	1.32704	17.12	3.58	5.3	1.48045	22.44	5.32	8	1.50376	27.55	5.11	9.397	1.83894	2.28	3.134	1.37456	17.19	26.917	1.56585	19.47	30.051	1.54345	3.5	3.6	3	3.5	4	4	3.55	3.625	3.5875	0.162857	0.613929	0.463571	0.223857	0.961321	0.7155
1	7.42	8.78	1.36	1.55	1.13971	10.49	1.71	2.29	1.33918	13.98	3.49	4.86	1.39255	18	4.02	6	1.49254	22.1	4.1	6.64	1.61951	27.7333	5.63333	9.13	1.62071	3.07	3.84	1.25081	17.2433	26.63	1.54436	20.3133	30.47	1.5	4	4	4	3.5	4	4	4	3.875	3.9375	0.219286	0.615833	0.483651	0.274286	0.951071	0.725476
2	5.945	7.335	1.39	1.32	0.94964	10.22	2.885	3.221	1.11646	13.58	3.36	4.33	1.28869	17.42	3.84	5.873	1.52943	21.6	4.18	5.88	1.4067	27	5.4	9	1.66667	4.275	4.541	1.06222	16.78	25.083	1.49482	21.055	29.624	1.40698	4	4	3.5	4	4	4	4	3.875	3.9375	0.305357	0.599286	0.50131	0.324357	0.895821	0.705333
2	7.165	8.625	1.46	1.45	0.993151	10.18	1.555	2.08	1.33762	14.16	3.98	6.07	1.52513	18.22	4.06	6.08	1.49754	23.02	4.8	7.7	1.60417	28.02	5	8	1.6	3.015	3.53	1.17081	17.84	27.85	1.5611	20.855	31.38	1.50468	4	4	4	4	4	3.7	4	3.925	3.9625	0.215357	0.637143	0.496548	0.252143	0.994643	0.747143
2	7.315	8.235	0.92	1.35714	1.47516	9.86	1.625	2.07	1.27385	13.58	3.72	4.96	1.33333	17.88	4.3	5.99	1.39302	21.84	3.96	6.24	1.57576	27.39	5.55	9.77	1.76036	2.545	3.42714	1.34662	17.53	26.96	1.53793	20.075	30.3871	1.51368	3.6	4	4	4	3.7	4	3.8	3.925	3.8625	0.181786	0.626071	0.477976	0.244796	0.962857	0.723503
2	7.26	8.16	0.9	1.11	1.23333	11.22	3.06	3.87143	1.26517	15.58	4.36	6	1.37615	19.8	4.22	6.5	1.54028	24.27	4.47	6.48	1.44966	29.395	5.125	8.33333	1.62602	3.96	4.98143	1.25794	18.175	27.3133	1.5028	22.135	32.2948	1.45899	3.8	3.8	4.2	4	4.1	4	3.8	4.075	3.9375	0.282857	0.649107	0.527024	0.355816	0.975476	0.768923
2	7.21	8.29	1.08	1.07	0.990741	10.32	2.03	2.69	1.32512	14.55	4.23	5.54	1.30969	18.6	4.05	5.78571	1.42857	23.84	5.24	7.5	1.4313	29.37	5.53	8.8	1.59132	3.11	3.76	1.209	19.05	27.6257	1.45017	22.16	31.3857	1.41632	4	3.6	3.6	3.6	4	4	3.8	3.8	3.8	0.222143	0.680357	0.527619	0.268571	0.986633	0.747279
2	9.67	10.75	1.08	1.11	1.02778	12.5	1.75	2.51	1.43429	16.34	3.84	4.83	1.25781	20.3	3.96	5.71429	1.443	24.56	4.26	6.48	1.52113	29.72	5.16	8.66667	1.67959	2.83	3.62	1.27915	17.22	25.691	1.49193	20.05	29.311	1.46189	3.8	4	4	4	3.8	4	3.9	3.95	3.925	0.202143	0.615	0.477381	0.258571	0.917534	0.69788
2	7.55	9.48	1.93	2.01429	1.04367	10.76	1.28	1.84	1.4375	14.75	3.99	4.48	1.12281	18.62	3.87	5.6	1.44703	22.94	4.32	6.428	1.48796	28.14	5.2	8.96	1.72308	3.21	3.85429	1.20071	17.38	25.468	1.46536	20.59	29.3223	1.4241	4	4	3.8	3.7	4	4	4	3.875	3.9375	0.229286	0.620714	0.490238	0.275306	0.909571	0.69815
2	7.68	8.51	0.83	0.98	1.18072	10.36	1.85	2.54	1.37297	14.34	3.98	4.86	1.22111	18.08	3.74	5.01	1.33957	22.54	4.46	7	1.56951	28.18	5.64	9.83333	1.7435	2.68	3.52	1.31343	17.82	26.7033	1.4985	20.5	30.2233	1.47431	4	3.5	4	4	3.5	4	3.75	3.875	3.8125	0.191429	0.636429	0.488095	0.251429	0.95369	0.719603
2	7.88	9	1.12	1.49	1.33036	11.38	2.38	3.38	1.42017	15.44	4.06	5.33	1.31281	19.55	4.11	5.74	1.39659	25	5.45	7.64286	1.40236	30.5333	5.53333	8.96667	1.62048	3.5	4.87	1.39143	19.1533	27.6795	1.44515	22.6533	32.5495	1.43685	4	4	4	4.2	4.1	4.1	4	4.1	4.05	0.25	0.684048	0.539365	0.347857	0.988554	0.774989
2	9.1	10.32	1.22	1.32	1.08197	11.62	1.3	1.44	1.10769	15.58	3.96	5.08	1.28283	19	3.42	5.78571	1.69173	24.28	5.28	7.6	1.43939	29.55	5.27	8.33333	1.58128	2.52	2.76	1.09524	17.93	26.799	1.49465	20.45	29.559	1.44543	4	3.8	3.8	4	4	4	3.9	3.95	3.925	0.18	0.640357	0.486905	0.197143	0.957109	0.703787
2	7.88	9.2	1.32	1.52	1.15152	10.76	1.56	1.92	1.23077	14.07	3.31	4.55	1.37462	18.34	4.27	6.16	1.44262	22.42	4.08	6.47	1.58578	28.14	5.72	9.63333	1.68415	2.88	3.44	1.19444	17.38	26.8133	1.54277	20.26	30.2533	1.49325	3.5	3.8	3.6	3.9	4.1	3.8	3.65	3.85	3.75	0.205714	0.620714	0.482381	0.245714	0.957619	0.720317
3	7.505	8.96	0.98	1.1	1.12245	10.78	1.82	2.41	1.32418	14.5	3.72	4.86	1.30645	18.18	3.68	4.923	1.33777	22.48	4.3	5.51429	1.28239	28.08	5.6	8.67	1.54821	3.275	3.51	1.07176	17.3	23.9673	1.38539	20.575	27.4773	1.33547	4.2	4	4	4	4	4	4.1	4	4.05	0.233929	0.617857	0.489881	0.250714	0.855974	0.654221
3	7.685	9.225	1.05	1.36	1.29524	10.78	1.555	2.07	1.33119	14.7	3.92	4.8	1.22449	19.08	4.38	6.04286	1.37965	23.82	4.74	6.83	1.44093	29.28	5.46	9.26667	1.69719	3.095	3.43	1.10824	18.5	26.9395	1.45619	21.595	30.3695	1.40632	3.5	3.6	3.5	3.6	3.5	4	3.55	3.65	3.6	0.221071	0.660714	0.514167	0.245	0.962126	0.723084
3	7.15	8.53	1.38	1.5	1.08696	10.48	1.95	2.57143	1.31868	14.3	3.82	4.88	1.27749	17.92	3.62	5.06	1.39779	22	4.08	5.58	1.36765	27.3333	5.33333	8.57	1.60688	3.33	4.07143	1.22265	16.8533	24.09	1.42939	20.1833	28.1614	1.39528	3.8	3.8	4	4	4	4	3.8	4	3.9	0.237857	0.601905	0.480556	0.290816	0.860357	0.67051
3	8.02	9.66	1.64	1.57143	0.958188	11.82	2.16	2.61	1.20833	15.64	3.82	4.57	1.19634	20.05	4.41	6.35714	1.44153	25.47	5.42	7.311	1.34889	31.03	5.56	9.36	1.68345	3.8	4.18143	1.10038	19.21	27.5981	1.43666	23.01	31.7796	1.38112	4	4	4	4	4	4	4	4	4	0.271429	0.686071	0.547857	0.298673	0.985648	0.756656
3	6.355	7.48	1.125	1.4	1.24444	9.8	2.32	3.05	1.31466	13.14	3.34	4.02	1.20359	17.99	4.85	7.25	1.49485	23.36	5.37	7.08	1.31844	28.5	5.14	9	1.75097	3.445	4.45	1.29173	18.7	27.35	1.46257	22.145	31.8	1.43599	3	4	4	4	4	4	3.5	4	3.75	0.246071	0.667857	0.527262	0.317857	0.976786	0.757143
3	10.25	11.27	1.02	1.08	1.05882	12.38	1.11	1.47	1.32432	15.97	3.59	5	1.39276	19.75	3.78	5.042	1.33386	24.38	4.63	6.823	1.47365	29.6	5.22	8.8	1.68582	2.13	2.55	1.19718	17.22	25.665	1.49042	19.35	28.215	1.45814	4	4	3.8	4	3.4	3.8	4	3.75	3.875	0.152143	0.615	0.460714	0.182143	0.916607	0.671786
3	7.265	8.945	1.68	1.698	1.01071	10.87	1.925	2.92857	1.52134	14.28	3.41	3.93	1.15249	18.57	4.29	5.96	1.38928	23.98	5.41	7.17	1.32532	29.52	5.54	8.7	1.5704	3.605	4.62657	1.28338	18.65	25.76	1.38123	22.255	30.3866	1.36538	3.8	4	3.5	4	4	3.9	3.9	3.85	3.875	0.2575	0.666071	0.529881	0.330469	0.92	0.72349
3	7.21	8.79	1.58	1.99	1.25949	10.86	2.07	2.78	1.343	14.83	3.97	4.64	1.16877	19.22	4.39	5.88	1.33941	24	4.78	5.83	1.21967	28.88	4.88	8.54	1.75	3.65	4.77	1.30685	18.02	24.89	1.38124	21.67	29.66	1.36871	3.9	4	4	4	3.9	4	3.95	3.975	3.9625	0.260714	0.643571	0.515952	0.340714	0.888929	0.70619
3	7.344	9.064	1.72	1.8	1.04651	11.03	1.966	2.87	1.45982	14.88	3.85	4.97	1.29091	19	4.12	5.36	1.30097	24	5	6.85	1.37	29.15	5.15	8.55	1.66019	3.686	4.67	1.26696	18.12	25.73	1.41998	21.806	30.4	1.39411	4	3.8	4	4.2	4	3.8	3.9	4	3.95	0.263286	0.647143	0.51919	0.333571	0.918929	0.72381
3	7.86	9	1.14	1.28	1.12281	11.04	2.04	3.11429	1.52661	14.88	3.84	4.73	1.23177	19.5	4.62	6.84	1.48052	24.07	4.57	6.44	1.40919	29.75	5.68	9.76667	1.71948	3.18	4.39429	1.38185	18.71	27.7767	1.48459	21.89	32.171	1.46966	4	4	4	4.2	4	4	4	4.05	4.025	0.227143	0.668214	0.52119	0.313878	0.992024	0.765975
3	7.92	8.87	0.95	0.98	1.03158	10.86	1.99	2.71	1.36181	14.9	4.04	5.24	1.29703	19.8	4.9	7	1.42857	25.03	5.23	6.55	1.25239	30.46	5.43	9.37	1.7256	2.94	3.69	1.2551	19.6	28.16	1.43673	22.54	31.85	1.41304	4	4	4	4	4.2	4	4	4.05	4.025	0.21	0.7	0.536667	0.263571	1.00571	0.758333
4	6.74	7.87	1.13	1.38	1.22124	9.87	2	2.92857	1.46429	14.28	4.41	4.86	1.10204	18.74	4.46	5.77	1.29372	23.45	4.71	6.55	1.39066	29.35	5.9	9.07	1.53729	3.13	4.30857	1.37654	19.48	26.25	1.34754	22.61	30.5586	1.35155	4	4	4	4	3.8	4	4	3.95	3.975	0.223571	0.695714	0.538333	0.307755	0.9375	0.727585
4	7.245	8.24	0.995	1.22	1.22613	10.4	2.16	3	1.38889	14.32	3.92	4.8	1.22449	19.4	5.08	7	1.37795	25.01	5.61	6.49	1.15686	30	4.99	7.99	1.6012	3.155	4.22	1.33756	19.6	26.28	1.34082	22.755	30.5	1.34036	4	4	4	4	4	4	4	4	4	0.225357	0.7	0.541786	0.301429	0.938571	0.72619
4	7.035	8.64	1.605	1.9	1.1838	10.32	1.68	2.55	1.51786	14.52	4.2	5.06	1.20476	19.83	5.31	6.88	1.29567	24.59	4.76	7	1.47059	29.54	4.95	9.4	1.89899	3.285	4.45	1.35464	19.22	28.34	1.47451	22.505	32.79	1.45701	4	4	4	4	4	4	4	4	4	0.234643	0.686429	0.535833	0.317857	1.01214	0.780714
4	7.165	8.44	1.275	1.55	1.21569	10.38	1.94	2.41	1.24227	14.77	4.39	5.57	1.26879	18.42	3.65	5	1.36986	23.68	5.26	6.84	1.30038	29	5.32	9.26667	1.74185	3.215	3.96	1.23173	18.62	26.6767	1.43269	21.835	30.6367	1.4031	4	4	4	4	4	4	4	4	4	0.229643	0.665	0.519881	0.282857	0.952738	0.729444
4	6.785	8	1.215	1.27	1.04527	10.32	2.32	2.94	1.26724	13.97	3.65	5	1.36986	18.22	4.25	6.16	1.44941	23.38	5.16	6.05714	1.17386	28.88	5.5	9.44	1.71636	3.535	4.21	1.19095	18.56	26.6571	1.43627	22.095	30.8671	1.39702	3.4	3.8	4	4	4	4	3.6	4	3.8	0.2525	0.662857	0.526071	0.300714	0.952041	0.734932
4	9.96	11.11	1.15	1.33	1.15652	12.5	1.39	2.07	1.48921	16.22	3.72	4.85	1.30376	20.35	4.13	5.432	1.31525	24.44	4.09	6.18	1.511	29.77	5.33	9.78	1.8349	2.54	3.4	1.33858	17.27	26.242	1.51951	19.81	29.642	1.49631	3.5	3.6	4	4	4	4	3.55	4	3.775	0.181429	0.616786	0.471667	0.242857	0.937214	0.705762
4	8.155	9.38	1.225	1.5	1.22449	10.76	1.38	2.105	1.52536	15.32	4.56	5.55	1.21711	20.3	4.98	6.01429	1.20769	24	3.7	5.86	1.58378	29	5	9	1.8	2.605	3.605	1.38388	18.24	26.4243	1.4487	20.845	30.0293	1.4406	3.8	3.9	4	3.8	4	4	3.85	3.95	3.9	0.186071	0.651429	0.49631	0.2575	0.943724	0.714983
4	8.07	9.44	1.37	1.42	1.0365	11	1.56	2.08	1.33333	15.26	4.26	5.32	1.24883	19.6	4.34	4.923	1.13433	24.5	4.9	6.428	1.31184	30.04	5.54	9.76667	1.76294	2.93	3.5	1.19454	19.04	26.4377	1.38853	21.97	29.9377	1.36266	4	4	4	4	4	4	4	4	4	0.209286	0.68	0.523095	0.25	0.944202	0.712802
4	7.98	9.07	1.09	1.32	1.21101	11	1.93	2.54	1.31606	15.38	4.38	4.97	1.1347	19.3	3.92	5.44	1.38776	24.07	4.77	6.075	1.27358	29.08	5.01	8.78	1.7525	3.02	3.86	1.27815	18.08	25.265	1.3974	21.1	29.125	1.38033	3.8	3.9	3.9	4	4	4	3.85	3.975	3.9125	0.215714	0.645714	0.502381	0.275714	0.902321	0.693452
4	7.1	8.55	1.45	1.42	0.97931	10.42	1.87	2.75	1.47059	14.9	4.48	5.78	1.29018	18.62	3.72	5.06	1.36022	23.2	4.58	6.95	1.51747	28.58	5.38	8.85	1.64498	3.32	4.17	1.25602	18.16	26.64	1.46696	21.48	30.81	1.43436	3.5	3.7	4	4	4	4	3.6	4	3.8	0.237143	0.648571	0.511429	0.297857	0.951429	0.733571
4	8.38	9.67	1.29	1.38	1.06977	11.55	1.88	2.33	1.23936	14.94	3.39	4.55	1.34218	18.58	3.64	5.36	1.47253	23.4	4.82	7.06	1.46473	28.75	5.35	9	1.68224	3.17	3.71	1.17035	17.2	25.97	1.50988	20.37	29.68	1.45704	4	3.5	4	4	4	4	3.75	4	3.875	0.226429	0.614286	0.485	0.265	0.9275	0.706667
[truncated: 1 more columns]
