# Supplementary material for: Ferric citrate is a safe and digestible source of iron in broilers and piglets
Source: PeerJ. 2021 Dec 22;9:e12636. doi: 10.7717/peerj.12636 (PMC8710060; doi:10.7717/peerj.12636)
Supplement: Supplemental Information 4 [file peerj-09-12636-s004.xlsx]

## Sheet: Performance_Fscoring
Treatment	Age at start	BW 25 d (kg)	BW dat 14d post-weaning (kg)	BW 42d (kg)	ADG 1-14 (g/d)	ADG d 15-42 (g/d)	ADG d 1-42 (g/d)	ADFI 1-14 d post-weaning (g/d)	ADFI 15-42 d post-weaning (g/d)	ADFI 1-42 d post-weaning (g/d)	FCR d 1-14	FCR d 15-42	FCR d 25-66	Score wk 1-2	Score wk 3-6	Score wk 1 - 6
1	24.4	6.5	8.37	22.3	133.571	497.5	376.19	172.143	760.357	564.286	1.28877	1.52836	1.5	3.9	3.95	3.925
1	24	6.7	8.22	23.03	108.571	528.929	388.81	150.714	822.5	598.571	1.38816	1.55503	1.5395	3.55	4	3.775
1	25	5.98	8.04	23.15	147.143	539.643	408.81	208.571	809.643	609.286	1.41748	1.50033	1.49039	3.75	3.85	3.8
1	25	5.67	7.13	22.54	104.286	550.357	401.667	147.143	840.357	609.286	1.41096	1.52693	1.51689	3.25	3.825	3.5375
1	25	5.98	7.87	22.46	135	521.071	392.381	142.857	752.143	549.048	1.0582	1.44345	1.39927	3.4	3.8	3.6
1	24.6	6.22	7.87	22.55	117.857	524.286	388.81	116.429	764.077	548.194	0.987879	1.45737	1.40993	3.65	3.875	3.7625
1	24.6	6.08	7.55	23.05	105	553.571	404.048	127.143	810.893	582.976	1.21088	1.46484	1.44284	3.75	4	3.875
2	24.6	6.8	8.66	24.17	132.857	553.929	413.571	172.143	831.071	611.429	1.2957	1.50032	1.47841	3.75	3.95	3.85
2	24.4	5.9	7.59	22.87	120.714	545.714	404.048	140.714	798.75	579.405	1.16568	1.46368	1.434	3.9	3.9	3.9
2	24.8	5.93	7.91	23.35	141.429	551.429	414.762	168.571	789.925	582.807	1.19192	1.43251	1.40516	3.25	3.9	3.575
2	25	5.73	7.86	22.84	152.143	535	407.381	188.571	755.893	566.786	1.23944	1.41288	1.39129	3.5	3.9	3.7
2	24.6	6.23	7.89	22.84	118.571	533.929	395.476	135.714	779.098	564.637	1.14458	1.45918	1.42774	3.6	3.95	3.775
2	24.4	6.44	8.42	23.1	141.429	524.286	396.667	177.143	757.071	563.762	1.25253	1.44401	1.42125	3.65	3.9	3.775
2	25	6.11	7.98	24.03	133.571	573.214	426.667	166.429	837.857	614.048	1.24599	1.46168	1.43917	3.55	3.875	3.7125
3	25	6.5	8.52	23.18	144.286	523.571	397.143	162.857	770.357	567.857	1.12871	1.47135	1.42986	3.55	3.85	3.7
3	25	6.25	7.98	23.21	123.571	543.929	403.81	136.429	779.286	565	1.10405	1.4327	1.39917	3.65	3.95	3.8
3	24.4	5.8	7.38	23.5	112.857	575.714	421.429	140.714	777.5	565.238	1.24684	1.3505	1.34124	3.7	4	3.85
3	24.6	6	7.95	23.55	139.286	557.143	417.857	172.143	786.071	581.429	1.2359	1.4109	1.39145	3.7	4	3.85
3	24.2	6.11	8.23	23.44	151.429	543.214	412.619	177.857	805	595.952	1.17453	1.48192	1.44432	3.9	3.9	3.9
3	25	6.08	8.58	23.55	178.571	534.643	415.952	203.571	807.5	606.19	1.14	1.51035	1.45736	3.7	4	3.85
3	24.4	6.4	7.88	23.74	105.714	566.429	412.857	126.429	831.25	596.31	1.19595	1.46753	1.44435	3.8	4	3.9
4	24.2	6.62	8.46	24.17	131.429	561.071	417.857	157.857	805	589.286	1.20109	1.43475	1.41026	3.8	4	3.9
4	24.8	6.13	7.83	23.58	121.429	562.5	415.476	147.143	804.286	585.238	1.21176	1.42984	1.4086	3.75	3.95	3.85
4	24.6	5.58	7.55	23.67	140.714	575.714	430.714	161.429	806.071	591.19	1.14721	1.40012	1.37258	3.75	3.95	3.85
4	24.2	5.91	7.88	23.009	140.714	540.321	407.119	163.571	771.429	568.81	1.16244	1.42772	1.39716	3.8	4	3.9
4	25	6.45	8.29	23.95	131.429	559.286	416.667	158.571	796.786	584.048	1.20652	1.42465	1.40171	3.9	3.95	3.925
4	24.6	6.28	8.51	24.17	159.286	559.286	425.952	166.429	776.429	573.095	1.04484	1.38825	1.34544	3.75	3.9	3.825
4	24.6	6.14	8.25	24.22	150.714	570.357	430.476	184.286	845.714	625.238	1.22275	1.48278	1.45243	3.8	4	3.9
5	25	6.28	8.31	24.3	145	571.071	429.048	163.571	790	581.19	1.12808	1.38336	1.35461	3.75	4	3.875
5	25.2	5.9	7.97	24.06	147.857	574.643	432.381	166.429	836.786	613.333	1.1256	1.45618	1.4185	3.8	4	3.9
5	24.8	5.68	7.93	23.99	160.714	573.571	435.952	173.571	820.857	605.095	1.08	1.43113	1.38798	3.8	3.875	3.8375
5	24.6	6.27	8.35	24.25	148.571	567.857	428.095	186.429	780.714	582.619	1.25481	1.37484	1.36096	3.8	3.975	3.8875
5	24.8	6.63	8.97	23.72	167.143	526.786	406.905	189.286	757.5	568.095	1.13248	1.43797	1.39614	3.8	4	3.9
5	24.2	6.3	8.46	24.55	154.286	574.643	434.524	160	785.179	576.786	1.03704	1.36638	1.3274	3.9	3.95	3.925
5	24.8	6.11	8.42	24.98	165	591.429	449.286	180.714	812.857	602.143	1.09524	1.3744	1.34022	3.75	4	3.875
6	25	7.05	9.08	23.51	145	515.357	391.905	157.857	697.5	517.619	1.08867	1.35343	1.32078	3.7	3.85	3.775
6	24.2	5.83	7.89	24.38	147.143	588.929	441.667	175	827.5	610	1.18932	1.40509	1.38113	3.75	3.95	3.85
6	25.2	5.85	8.53	24.08	191.429	555.357	434.048	214.286	776.786	589.286	1.1194	1.39871	1.35765	3.6	3.925	3.7625
6	24.6	6.01	8.07	24.1	147.143	572.5	430.714	163.571	834.643	610.952	1.11165	1.45789	1.41846	3.75	3.875	3.8125
6	24.8	5.98	8.01	24.33	145	582.857	436.905	151.429	809.643	590.238	1.04433	1.38909	1.35095	3.7	3.875	3.7875
6	24.8	6.18	8.38	24.21	157.143	565.357	429.286	177.143	788.214	584.524	1.12727	1.39419	1.36162	3.6	3.95	3.775
6	24.6	6.22	8.19	24.9	140.714	596.786	444.762	157.143	831.786	606.905	1.11675	1.39378	1.36456	3.8	3.975	3.8875

## Sheet: Digestibility
Treatment	DM (%)	Dig. CA (%)	Dig Fe (%)
1	34.6917	44.471	11.0323
1	39.5818	45.7984	11.1779
1	37.8143	44.7425	9.81642
1	35.4982	45.4473	11.0185
1	34.4799	42.9706	11.434
1	33.7224	45.5986	7.97359
1	38.4703	46.2357	7.8696
2	42.0983	49.809	13.3604
2	31.4524	55.0662	13.8024
2	37.5	54.5143	9.85171
2	37.6434	52.9877	12.6451
2	36.4179	53.4042	14.4392
2	38.5301	47.0581	11.9624
2	38.9648	50.5898	12.0913
3	33.8358	56.5149	11.3296
3	38.5088	57.3217	13.6885
3	35.9927	55.1246	16.3202
3	31.5445	42.1199	15.0526
3	38.9558	52.9712	16.9942
3	38.0157	57.7017	12.9906
3	36.5179	55.0006	9.42437
4	30.625	55.7687	16.9456
4	39.1185	54.6946	21.958
4	38.6364	53.4318	23.8889
4	36.9565	54.5228	22.7144
4	32.8662	54.8766	26.4201
4	37.2163	55.8536	18.8711
4	41.7476	54.0314	21.6145
5	40.7792	53.183	17.7695
5	39.2157	49.3472	17.6544
5	39.16	52.7592	23.098
5	41.9562	56.2142	23.0593
5	36.1607	49.0326	19.4567
5	39.3885	49.0844	16.1855
5	38.5101	50.6978	21.1462
6	40.8201	47.9872	14.6388
6	35.9729	55.9293	15.7732
6	38.089	50.32	14.2349
6	39.3678	55.0502	28.5981
6	37.0136	55.5029	18.095
6	42.2492	52.0849	15.6109
6	40.1813	51.3814	13.2671

## Sheet: Blood D25
Treatment	Leukozytes (G/l)	Erythrozytes (T/l)	Haemoglobin (g/l)	Haematocrit (l/l)	MCV (fl)	MCH pg	MCHC (g/dl)	Thrombozytes (G/l)	Neutrophils (%)	Lymphozytes (%)	Monozytes (%)	Eosinophils (%)	Basophils (%)	Other cells (%)	Alkaline phosphatase (U/l)	AST (U/l)	ALT (U/l)	GLDH U/l	Total bilirubin (µmol/l)	Cholesterin (mmol/l)	Triglyzerides (mmol/l)	Urea (mmol/l)	Sodium (mmol/l)	Potassium (mmol/l)	Calcium (mmol/l)	Chloride (mmol/l)	Phosphate (mmol/l)	Glucose (mmol/l)	Albumin s(mmol/l)	Total protein (mmol/l)	Haptoglobin (mg/ml)	SOD U/ml	SOD (U/Hb)
1	7.8	6.06	103	0.31	51.1551	16.9967	29.1429	131	40	55	1	2	1	1	575	41	48	2	5.7	3.79	1.56	4.38	141	4.9	2.78	102	3.52	3.61	25.4	53	0.43	1.22	1184.47
1	14.7	5.66	102	0.35	61.8375	18.0212	31.8182	305	48	43	3	4	0	2	604	34	45	2	14.8	3.21	0.78	3.71	141	4.8	2.65	101	3.17	4.83	32.7	50	0.89	1.08	1058.82
1	8.2	5.08	105	0.33	64.9606	20.6693	23.8462	399	36	56	4	4	0	0	575	32	45	2	8.5	3.97	1.44	3.77	142	5.3	2.39	101	3.22	3.87	31.2	58	0.44	1.32	1257.14
1	8.8	6.46	93	0.39	60.3715	14.3963	31.5625	203	45	46	3	4	1	1	358	39	34	2	10.6	3.53	0.66	3.45	142	5.4	2.68	104	3.48	5.67	34.7	48	0.63	1.4	1505.38
1	10.7	5.43	101	0.32	58.9319	18.6004	30.6667	258	43	46	5	5	0	1	739	33	36	2	13.2	3.06	0.78	2.47	139	4.7	2.38	98	3.48	3.08	28.1	51	0.51	1.28	1267.33
1	10.9	5.97	92	0.3	50.2513	15.4104	31.1765	264	49	43	3	4	1	0	940	38	48	2	12.2	3.34	0.77	1.55	136	5.1	2.64	100	3.29	3.45	33	47	0.47	1.11	1206.52
1	8.58	6.44	106	0.34	52.795	16.4596	30	163	52	39	6	2	0	1	637	49	40	2	11.8	3.2	0.51	2.32	140	5	2.72	100	2.98	3.55	27.9	50	0.86	1.51	1424.53
2	11.6	6.32	104	0.36	56.962	16.4557	26.7568	127	42	52	4	1	1	0	439	28	43	2	13.2	3.5	0.83	3.14	139	4.8	2.22	102	3.82	4.09	31.4	54	0.63	1.22	1173.08
2	9.9	5.95	99	0.37	62.1849	16.6387	29.1429	401	45	48	2	4	1	0	474	23	36	2	13.4	3.34	1.07	2.39	142	5.3	2.63	100	3.1	3.45	31.8	58	0.66	1.08	1090.91
2	8	6.46	102	0.35	54.1796	15.7895	30.2857	237	49	44	2	4	1	0	842	47	35	2	11.6	3.16	1.04	3.53	142	5.2	2.57	103	3.59	4.38	29.4	52	0.47	1.32	1294.12
2	9	6.88	106	0.35	50.8721	15.407	28	153	43	48	4	3	1	1	660	26	44	2	12.5	3.34	1.38	2.26	139	5.1	2.77	102	3.29	4.55	28.3	52	0.59	1.22	1150.94
2	9.1	5.5	98	0.35	63.6364	17.8182	29.3939	353	41	49	5	3	0	2	802	35	32	2	6.9	3.14	0.85	3.18	135	4.9	2.38	102	2.89	3.84	30.7	44	0.54	1.34	1367.35
2	8.2	5.34	97	0.33	61.7978	18.1648	31.5625	310	44	51	1	4	0	0	442	55	57	2	7.7	3.5	0.8	3.68	137	4.5	2.77	99	3.27	3.94	29.2	50	0.42	1.28	1319.59
2	10.1	5.36	101	0.32	59.7015	18.8433	29.0947	250	43	50	3	3	1	0	558	39	51	2	8.5	3.6	0.67	3.66	141	5.2	2.74	103	2.95	3.34	29	50	0.55	1.22	1227.6
3	9.7	6.15	105	0.37	60.1626	17.0732	29.4118	250	43	46	2	9	0	0	703	47	41	2	11.3	3.16	0.91	2.29	141	5.5	2.52	102	3.12	3.89	26.3	52		1.22	1159
3	9.6	4.87	100	0.34	69.8152	20.5339	27.5	216	49	43	4	1	1	2	682	39	34	2	9.3	4.4	0.53	2.99	144	5.8	2.78	102	2.95	4.83	31.5	56	1.13	1.3	1300
3	9	5.99	99	0.36	60.1002	16.5275	26.5789	385	51	44	3	1	1	0	744	34	38	1.9	8.3	3.4	1.44	4.05	139	5	2.74	101	3.54	3.44	28	49	0.57	1.18	1191.92
3	8.9	5.35	101	0.38	71.028	18.8785	26.4865	197	42	44	5	7	1	1	440	38	38	2	12.5	3.18	0.77	2.24	143	5.2	2.84	102	3.39	3.84	29.6	46	0.56	1.26	1247.52
3	6.1	5.99	98	0.37	61.7696	16.3606	32.9032	251	56	38	2	4	0	0	564	42	42	2	13	2.86	1.14	2.76	138	4.8	2.39	102	3.49	3.22	29.5	47	0.76	1.3	1326.53
3	13.4	6.307	102	0.31	49.1517	16.1725	28.8235	227	46	46	4	2	0	2	462	30	50	2	12.5	3.75	1.08	3.76	142	4.1	2.51	104	3.84	3.25	30.1	49	0.51	1.11	1088.24
3	7.4	6.38	98	0.34	53.2915	15.3605	28.4615	263	51	40	5	3	1	0	795	29	62	2	11	3.66	1.05	3.28	140	4.2	2.56	96	2.73	4.36	29	53	0.88	1.35	1377.55
4	9.4	6.02	101	0.38	63.1229	16.7774	29.1429	316	45	46	5	2	1	1	558	36	43	2	13.5	2.84	1.14	3.11	135	5.2	2.63	100	3.35	3.36	28	54	0.75	1.92	1900.99
4	13.6	5.91	102	0.35	59.2217	17.2589	29.7143	323	45	52	1	2	0	0	521	32	50	2	14.2	4.24	0.92	2.64	140	4.8	2.52	100	3.41	4.42	29.6	44	0.75	1.37	1343.14
4	9.8	6.55	104	0.35	53.4351	15.8779	25.5263	289	43	49	5	1	1	1	698	50	44	1.8	8.4	3.88	0.88	3.38	142	5.8	2.55	104	3.34	4.36	29.5	49	0.65	1.14	1096.15
4	6.1	6.63	97	0.38	57.3152	14.6305	26.8421	282	50	45	2	2	0	1	650	34	39	2	13.2	3.61	1.05	3.18	140	4.2	2.75	102	3.16	3.53	28	51	0.48	1.04	1072.16
4	12.8	5.55	102	0.38	68.4685	18.3784	27.2222	264	49	45	2	4	0	0	780	42	45	2	10.4	3.08	0.76	3.09	141	5	2.63	100	3.35	3.97	29	48	0.49	1.28	1254.9
4	6	4.64	98	0.36	77.5862	21.1207	30.2941	206	48	41	4	7	0	0	393	32	41	2	12.8	3.74	0.72	3.3	141	4.9	2.67	101	3.16	3.71	31.3	48	0.88	1.03	1051.02
4	8.3	6.68	103	0.34	50.8982	15.4192	27.8346	258	40	49	7	3	1	0	645	40	48	2	11	2.9	0.75	3.07	138	5	2.56	99	3.29	3.54	30.7	51	0.79	1.04	1009.71
5	8.8	6.82	100	0.36	52.7859	14.6628	31.5152	401	44	46	2	5	1	2	696	38	45	2	13.6	3.36	0.94	2.29	140	5.8	2.76	102	3.24	4.08	30.4	51	0.42	1.11	1110
5	6.3	6.18	104	0.33	53.3981	16.8285	27.5676	237	46	45	3	4	1	1	574	45	54	2	7	3.52	1.05	2.99	141	4.5	2.46	102	3.37	3.18	26.5	54	0.47	1.2	1153.85
5	9.4	5.41	102	0.37	68.3919	18.854	27.5676	253	44	49	4	2	0	1	504	40	39	2	11	2.74	1.22	3.24	132	4.4	2.42	101	3.18	4.34	28.9	50	0.57	1.11	1088.24
5	9.6	5.85	102	0.37	63.2479	17.4359	30.2941	185	46	45	3	4	1	1	542	35	37	2	11.6	3.83	1.17	2.76	141	4.8	2.55	101	3.21	3.22	30.8	46	0.56	1.28	1254.9
5	10.8	5.6	103	0.34	60.7143	18.3929	30.5882	197	48	46	4	2	0	0	350	34	35	2	8	3.44	1.05	3.75	142	4.2	2.98	103	3.22	3.95	33	45	0.76	1.51	1466.02
5	7.6	6.25	104	0.34	54.4	16.64	27.2222	227	47	46	4	2	0	1	956	42	53	2	8.2	3.27	0.69	2.64	142	5.2	2.26	100	3.31	4.22	28.9	51	0.88	1.22	1173.08
5	11.9	5.78	98	0.36	62.2837	16.955	28.8664	263	50	42	2	4	1	1	470	30	40	2	14.2	3.11	0.5	3.28	138	5	2.72	99	3.29	4.38	29.1	47	0.58	1.32	1346.94
6	7.6	5.92	103	0.38	64.1892	17.3986	31.875	155	40	54	2	2	0	2	650	35	43	2	8.3	3.22	0.73	3.42	138	4.8	2.52	100	3.15	3.96	32	55	0.66	1.55	1504.85
6	9.1	5.98	102	0.32	53.5117	17.0569	30.303	251	45	46	6	2	1	0	622	42	42	2	12.2	3.17	0.58	3.28	142	5.6	2.39	102	3.51	3.95	29.8	52	0.63	1.09	1068.63
6	7	5.62	100	0.33	58.7189	17.7936	29.7143	236	48	46	2	2	2	0	780	33	45	2	14.5	3	0.85	3.11	140	4.9	2.56	101	3.5	3.59	29.3	52	0.47	1.4	1400
6	8.3	6.88	104	0.35	50.8721	15.1163	25.7895	316	42	47	7	3	1	0	396	42	33	2	12.9	3.86	1.15	2.64	142	5.5	2.52	101	3.26	4.08	27.4	46	0.43	1.22	1173.08
6	9.3	5.95	98	0.38	63.8655	16.4706	28.8571	323	49	44	3	3	1	0	574	38	48	2	10.3	3.14	1.04	3.18	138	4.5	2.63	100	3.05	3.85	30.5	51	0.42	1.35	1377.55
6	10.7	6.67	101	0.35	52.4738	15.1424	28.3333	289	42	50	2	4	1	1	509	30	41	2	11	3.87	1.1	2.09	140	5.1	2.82	101	3.09	3.42	31.5	44	0.5	1.16	1148.51
6	11.9	5.43	102	0.36	66.2983	18.7845	28.7449	165	48	45	2	3	1	1	596	32	44	2	10.3	3.22	1.07	2.8	142	4.5	2.75	97	3.18	4.44	28.6	45	0.48	1.1	1078.43

## Sheet: Blood D66
Treatment	Leukozytes (G/l)	Erythrozytes (T/l)	Haemoglobin (g/l)	Haematocrit (l/l)	MCV (fl)	MCH pg	MCHC (g/dl)	Thrombozytes (G/l)	Neutrophils (%)	Lymphozytes (%)	Monozytes (%)	Eosinophils (%)	Basophils (%)	Other cells (%)	Alkaline phosphatase (U/l)	AST (U/l)	ALT (U/l)	GLDH U/l	Total bilirubin (µmol/l)	Cholesterin (mmol/l)	Triglyzerides (mmol/l)	Urea (mmol/l)	Sodium (mmol/l)	Potassium (mmol/l)	Calcium (mmol/l)	Chloride (mmol/l)	Phosphate (mmol/l)	Glucose (mmol/l)	Albumin (mmol/l)	Total protein (mmol/l)	Haptoglobin (mg/ml)	SOD U/ml	SOD (U/Hb)
1	18.5	7.63	113	0.37	48.9	14.8	30.3	262	51	41	4	3	1	0	272	103	66	3.1	0.3	2	0.88	3.47	143	7.1	2.68	104	3.91	3.37	27.3	53	1.11	1.79	1584.07
1	19.4	6.74	109	0.37	54.9	16.2	29.5	541	41	51	4	2	1	1	224	48	52	1.8	1.3	2.29	0.79	5	148	6.4	2.95	106	4.03	5.53	26.2	52	1.08	1.95	1788.99
1	16.6	6.38	95	0.32	50.8	14.9	29.3	676	43	48	6	2	1	0	236	26	35	2	1.2	2.01	0.64	1.44	143	5.2	2.98	104	3.41	7.07	24.7	47	1.11	1.85	1947.37
1	15.9	5.93	101	0.32	53.8	17	31.7	375	46	48	2	2	1	1	238	52	49	1.8	1.8	1.83	0.65	1.59	144	5.7	2.76	105	3.75	5.9	27.8	47	1.11	1.74	1722.77
1	15	6.38	95	0.32	50.8	14.9	29.3	473	50	39	1	4	0	6	302	45	40	2	2.7	3.17	0.62	3.49	141	4.4	2.36	102	3.07	4.32	26.6	57	0.94	1.65	1736.84
1	11.1	7.23	92	0.32	44.4	12.7	28.7	580	47	39	3	4	1	6	294	35	45	2	3.2	3.6	0.49	2.69	133	5.2	2.54	97	3.03	4.99	31.4	51	1.13	1.55	1684.78
1	18.4	6.03	106	0.35	58.7	17.6	30	608	45	46	6	2	0	1	275	25	62	2	2.8	3.5	0.55	2.32	132	5.5	2.48	97	2.94	4.23	31.8	52	1.02	1.08	1018.87
2	13.87	5.69	92	0.32	44.4	12.7	28.7	469	42	50	4	1	1	2	338	48	62	2	2.7	3.23	0.74	2.97	139	5.5	2.39	101	3.24	5.07	29.4	48	1.19	1.65	1793.48
2	15.66	6.23	110	0.38	61	17.7	29	526	49	42	2	4	1	2	249	29	42	2	2.5	3.08	0.69	1.78	143	5.4	2.64	101	3.58	5.16	28.4	48	0.88	1.52	1381.82
2	13.75	6.81	102	0.36	53	15	28.3	693	41	40	5	4	1	9	348	49	73	2	3.8	2.76	0.71	2.03	137	4.1	2.88	100	3.2	6.2	34.3	53	1.32	1.64	1607.84
2	13.7	6.37	98	0.33	54.1	16.1	29.7	546	48	41	4	3	1	3	285	36	57	2	3.9	3.22	0.89	2.8	139	4.4	2.51	106	3.2	5.34	28.9	58	0.88	1.65	1683.67
2	16.88	6.07	98	0.33	51.1	16.1	29.7	429	49	43	4	3	0	1	217	29	52	2	3.6	2.84	1.17	3.73	143	4.6	2.29	101	3.27	5.18	28.1	51	0.95	1.68	1714.29
2	21.552	7.1	112	0.37	51.7	15.8	30.5	440	52	41	1	4	0	2	213	41	56	2	3.4	3.96	0.68	3.12	141	4.4	2.87	103	3.2	6.52	32.8	42	1.1	1.55	1383.93
2	16.8	6.66	103	0.35	52.9	15.5	29.2	655	42	48	3	3	1	3	255	39	64	2		3.7	0.48	3.41	138	5.6	2.92	92	2.71	5.3	32.5	56	1.05	1.76	1708.74
3	23.1	6.64	98	0.33	54.1	16.1	29.7	929	65	25	5	3	1	1	223	43	47	1.8	1.4	2.15	0.51	0.91	141	5.3	2.75	100	4.23	3.68	23	48	0.94	1.85	1887.76
3	20.4	6.19	100	0.34	54.1	16.2	29.9	335	29	59	8	2	1	1	241	81	62	2.1	1.5	2.4	0.76	1.07	144	5.9	2.88	103	3.97	5.76	30.1	54	1.2	1.55	1550
3	23.4	5.95	102	0.32	54.4	17.1	31.5	498	48	46	4	1	1	0	325	32	38	2	2.1	1.04	0.3	2.87	144	5.4	2.99	101	3.03	5.11	25.5	47	0.99	1.76	1725.49
3	20.2	6.52	107	0.36	54.9	16.4	29.9	440	50	42	6	1	1	0	262	26	31	1.9	2.6	1.25	0.43	3.52	142	5.6	2.87	106	3.52	5.78	27.5	48	1	1.28	1196.26
3	16.8	7.23	95	0.32	50.8	14.9	23.3	673	42	50	4	4	0	0	302	48	67	1.2	1.3	3	0.26	1.58	141	4.4	2.36	102	3.07	5.6	26.7	47	1.02	1.58	1663.16
3	11.5	6.25	105	0.36	57.8	16.8	29.1	256	51	39	5	4	1	0	425	37	30	3.9	2.5	6.97	0.53	2.69	143	5.5	2.57	101	3.24	3.22	28.9	58	0.98	1.82	1733.33
3	9.1	6.81	102	0.36	56	15	28.3	593	34	51	4	9	1	0	302	42	50	14.2	2.8	3.21	0.55	2.45	138	4.8	2.63	102	2.9	4.26	29.3	52	0.97	2.08	2039.22
4	23.9	6.54	98	0.33	54.1	16.1	29.7	929	44	45	5	3	1	2	324	62	83	1.9	2.2	1.92	0.56	2.56	140	5.6	2.76	101	3.62	4.59	22.6	50	1.04	2.08	2122.45
4	20	7.54	103	0.35	52.9	15.5	29.2	748	40	48	7	3	1	1	233	42	50	2	0.7	2.4	0.5	5.76	140	6.1	2.76	102	3.82	4.08	25.2	53	0.85	2.04	1980.58
4	16.5	6.6	92	0.325	44.4	12.7	28.7	580	63	28	4	3	1	1	340	30	37	1.8	2.4	2.42	0.39	1.68	148	6.2	2.99	97	3.2	4.35	26.9	52	1.11	2.24	2434.78
4	22.4	6.98	112	0.37	53.6	16	29.9	414	54	37	6	2	1	0	295	47	50	2	1.8	1.74	0.46	3.87	138	6.6	2.42	104	3.67	4.64	26.6	53	0.98	2.05	1830.36
4	17.69	7.24	110	0.37	51.5	15.2	29.5	934	48	44	5	2	1	0	218	35	53	2	1.5	2.3	0.85	1.8	146	5.4	3.19	103	4.04	4.25	32.9	57	0.85	1.62	1472.73
4	15.6	6.34	107	0.34	53.1	16.9	31.8	492	39	49	9	2	0	1	270	51	32	2	1.3	1.61	0.52	3.17	145	5.8	2.96	102	2.4	4.96	27.4	50	0.9	1.87	1747.66
4	16.3	5.64	108	0.35	61.9	19.1	30.9	381	44	48	5	1	0	2	228	59	70	1.8	0.4	1.83	0.48	2.14	142	6	2.97	107	4.42	5.66	27.1	50	0.92	2.22	2055.56
5	11.5	6.85	109	0.36	52.5	15.9	30.3	596	47	39	5	9	0	0	249	37	45	2	3.5	3.01	0.77	2.48	140	4.9	2.39	100	3.03	5.32	28.7	55	0.98	2.52	2311.93
5	27.69	7.24	98	0.33	54.1	16.1	29.7	929	48	44	5	2	1	0	218	35	53	2	1.5	2.3	0.85	1.8	146	5.4	3.19	103	4.04	4.25	32.9	57	1.04	2.12	2163.27
5	15.6	6.34	107	0.34	53.1	16.9	31.8	492	39	49	9	2	0	1	270	51	32	2	1.3	1.61	0.52	3.17	145	5.8	2.96	102	2.4	4.96	27.4	50	1.11	2.37	2214.95
5	16.3	5.64	108	0.35	61.9	19.1	30.9	381	44	48	5	1	0	2	228	59	70	1.8	0.4	1.83	0.48	2.14	142	6	2.97	107	4.42	5.66	27.1	50	1.05	2.06	1907.41
5	11.1	5.69	114	0.37	65.1	20	30.8	616	48	33	4	8	1	6	266	38	54	2	2	2.36	0.64	1.86	140	4.3	2.38	102	3.07	4.23	30.5	51	0.94	2.05	1798.25
5	16	6.81	102	0.36	53	15	28.3	508	48	36	7	8	1	0	271	23	53	2	2.5	2.42	0.75	1.8	141	4.9	2.54	107	3.19	5.16	28.9	48	0.89	2.06	2019.61
5	22.4	6.09	98	0.33	54.1	16.1	29.7	588	54	37	6	2	1	0	195	47	50	2	1.8	1.74	0.46	3.87	138	6.6	2.42	104	3.67	4.64	26.6	53	0.88	2.38	2428.57
6	24.2	5.81	100	0.34	57.6	17.2	29.9	431	48	45	4	2	1	0	225	28	38	2.1	1.8	1.5	0.44	1.31	146	5.7	3.01	105	3.92	5.05	24	53	1.13	2.25	2250
6	14.3	7.02	113	0.38	53.9	16.1	29.9	358	37	54	5	2	1	1	179	80	69	2	1.7	1.99	0.5	1.99	147	6.5	2.8	103	4.38	5.35	32	55	0.88	2.32	2053.1
6	13.3	6.81	102	0.36	53	15	28.3	699	32	57	7	3	1	0	279	43	73	2	1.5	1.9	0.49	2.12	145	6.4	2.75	103	4.29	6.03	32.4	54	0.98	2.14	2098.04
6	27.5	5.6	98	0.33	59	17.5	29.7	564	59	34	3	3	1	0	270	38	53	1.8	1.8	1.46	0.48	0.8	147	5.8	3	103	3.61	5.48	26.6	48	1.02	1.85	1887.76
6	20	7.54	92	0.32	44.4	12.7	28.7	580	40	48	7	3	1	1	233	42	50	2	0.7	2.4	0.5	5.76	140	6.1	2.76	102	3.82	4.08	25.2	53	0.99	2.11	2293.48
6	17.5	5.95	109	0.36	66	20.6	31.3	601	48	40	3	5	1	3	237	36	42	2	2.3	3.41	1.01	2.41	138	4.3	2.33	93	2.98	6.01	27.8	57	0.85	2.28	2091.74
6	16.4	6.67	117	0.37	57.8	18.2	31.6	558	48	42	2	4	1	3	252	37	48	2	2.1	2.87	0.71	3.25	140	4.5	2.74	102	2.51	5.32	26.2	48	0.87	2.11	1803.42

## Sheet: Fe content
Treatment	Fe start mg/l	Fe - end mg/l
1	1.093	1.063
1	0.86	1.195
1	0.956	1.055
1	0.877	1.029
1	1.035	1.086
1	1.086	1.124
1	0.993	1.058
2	1.076	1.1874
2	1.03	1.0719
2	1.039	1.067
2	1.122	1.244
2	0.777	1.092
2	0.756	1.128
2	0.988	1.0885
3	0.963	1.159
3	1.073	1.262
3	0.997	1.034
3	1.005	1.211
3	1.03	1.142
3	0.89	1.085
3	0.896	1.115
4	1.16	1.208
4	1.222	1.135
4	0.969	1.145
4	0.788	1.088
4	1.039	1.244
4	0.901	1.125
4	0.8	1.113
5	0.865	1.095
5	0.984	1.272
5	1.111	1.1
5	0.879	1.177
5	0.897	1.152
5	0.964	1.195
5	1.044	1.098
6	0.975	1.144
6	0.8769	1.171
6	1.133	1.138
6	0.911	1.205
6	1.111	1.098
6	0.936	1.204
6	0.887	1.156
